# Supplementary material
Source: Springer Nature journal article supplement (https://www.springermedizin.de/resource/supplementary/12958_2012_1081_MOESM6_ESM.pdf/9566752)

HIF-1 $\alpha$

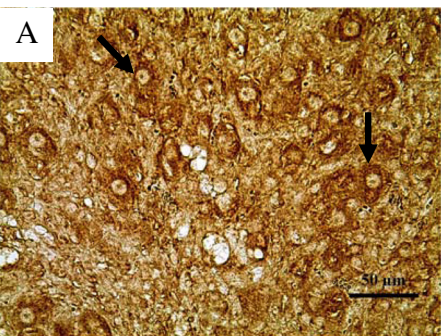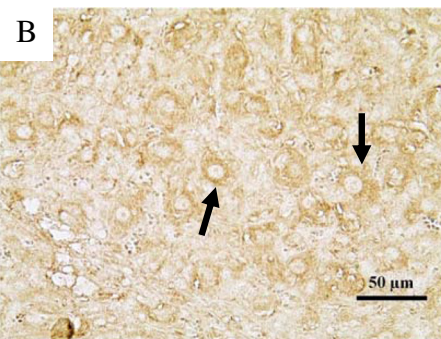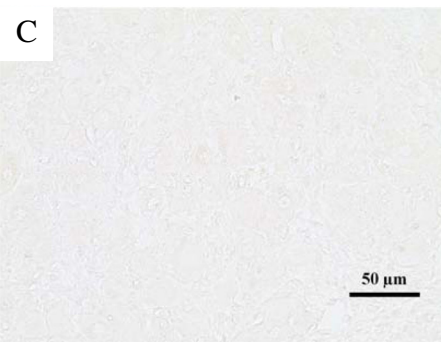

VEGF

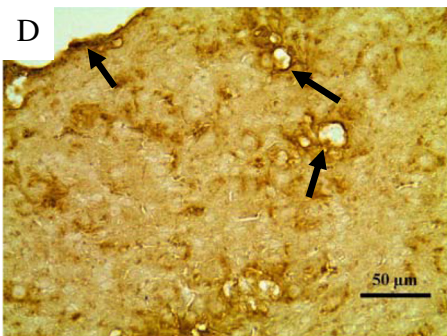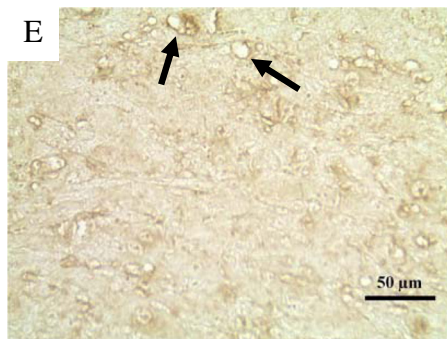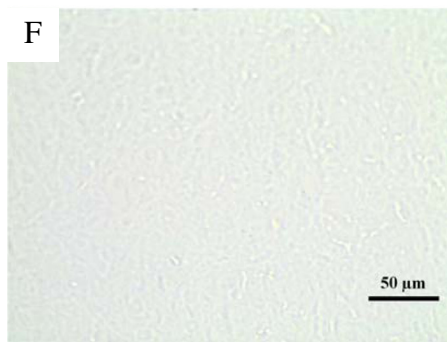

Supplement: MOESM6 [file 9566752]
